# Supplementary material for: An Evaluation of Quantitative PCR Assays (TaqMan® and SYBR Green) for the Detection of Babesia bigemina and Babesia bovis, and a Novel Fluorescent-ITS1-PCR Capillary Electrophoresis Method for Genotyping B. bovis Isolates
Source: PubMed Central journal article supplement (PMC5606575; doi:10.3390/vetsci3030023), 2016-09-13
Supplement: vetsci-03-00023-s001.pdf [file vetsci-03-00023-s001.pdf]

## Supplementary Materials: An Evaluation of Quantitative PCR Assays (TaqMan<sup>®</sup> and SYBR Green) for the Detection of *Babesia bigemina* and *Babesia bovis*, and a Novel Fluorescent-ITS1-PCR Capillary Electrophoresis Method for Genotyping *B. bovis* Isolates

Bing Zhang, Jacqueline L. Sambono, Jess A. T. Morgan, Bronwyn Venus, Peter Rolls and Ala E. Lew-Tabor

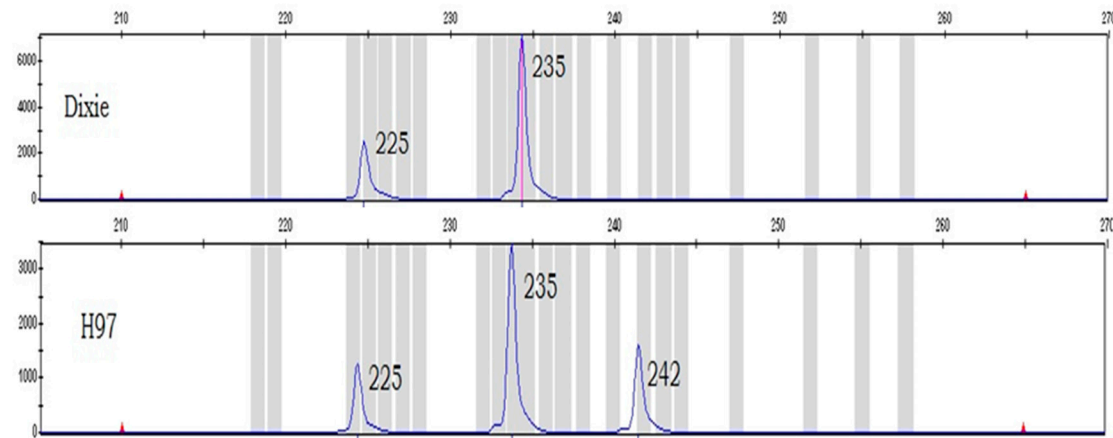

**Figure S1.** Example Genemapper plots showing peaks for Dixie vaccine and one field isolate H97. Note fragment sizes 225 and 235 bp for Dixie vaccine strain for this electrophoresis run.

**Table S1.** Comparison of standard PCR, TaqMan PCR and SYBR Green qPCRs for the detection of *B. bovis* and *B. bigemina* in reference isolates and field samples.

| Isolate/Field Strains                       | Sample for Extraction                   | <i>Babesia bovis</i> PCRs |            |          | <i>Babesia bigemina</i> PCRs |            |          |
|---------------------------------------------|-----------------------------------------|---------------------------|------------|----------|------------------------------|------------|----------|
|                                             |                                         | Standard PCR              | TaqMan PCR | SYBR PCR | Standard PCR                 | TaqMan PCR | SYBR PCR |
| <i>B. microti</i> -1610                     | DNA (CDC)                               | ND                        | negative   | negative | ND                           | negative   | negative |
| <i>B. microti</i> -1737                     | DNA (CDC)                               | ND                        | negative   | negative | ND                           | negative   | negative |
| <i>B. microti</i> -1750                     | DNA (CDC)                               | ND                        | negative   | negative | ND                           | negative   | negative |
| <i>B. microti</i> -1743                     | DNA (CDC)                               | ND                        | negative   | negative | ND                           | negative   | negative |
| <i>B. microti</i> -1716                     | DNA (CDC)                               | ND                        | negative   | negative | ND                           | negative   | negative |
| <i>B. duncani</i> -1671                     | DNA (CDC)                               | ND                        | negative   | negative | ND                           | negative   | negative |
| <i>Babesia</i> spp. 1749 CDC                | DNA (CDC)                               | ND                        | negative   | negative | ND                           | negative   | negative |
| <i>A. marginale</i> var. <i>centrale</i>    | 200 µL RBC pellet from 10 mL blood tube | ND                        | negative   | negative | ND                           | negative   | negative |
| <i>A. marginale</i> Dawn strain             | 200 µL RBC pellet from 10mL blood tube  | ND                        | negative   | negative | ND                           | negative   | negative |
| <i>B. bigemina</i> —G strain vaccine strain | Purified parasites from 75 mL blood     | negative                  | negative   | negative | positive                     | positive   | positive |
| <i>B. bovis</i> —Dixie vaccine strain       | Purified parasites from 75 mL blood     | positive                  | positive   | positive | negative                     | negative   | negative |
| <i>B. bovis</i> —1                          | blood smear (venous)                    | positive                  | ND         | positive | ND                           | ND         | negative |
| <i>B. bovis</i> —2                          | blood smear (liver)                     | positive                  | ND         | positive | ND                           | ND         | positive |
| <i>B. bovis</i> —3                          | blood smear (spleen)                    | positive                  | ND         | positive | ND                           | ND         | negative |
| <i>B. bovis</i> —4                          | blood smear (kidney)                    | positive                  | ND         | positive | ND                           | ND         | negative |
| <i>B. bovis</i> —5                          | blood smear (ear)                       | negative                  | ND         | positive | ND                           | ND         | negative |
| <i>B. bovis</i> —6                          |                                         | negative                  | ND         | positive | ND                           | ND         | negative |
| <i>B. bovis</i> —7                          |                                         | negative                  | ND         | positive | ND                           | ND         | negative |
| <i>B. bovis</i> —8                          |                                         | negative                  | ND         | positive | ND                           | ND         | negative |
| <i>B. bovis</i> —9                          | blood smear (venous)                    | negative                  | ND         | positive | ND                           | ND         | ND       |
| <i>B. bovis</i> —10                         |                                         | negative                  | ND         | positive | ND                           | ND         | positive |
| <i>B. bovis</i> —11                         |                                         | negative                  | ND         | positive | ND                           | ND         | negative |
| <i>B. bovis</i> —12                         | 200 µL RBC pellet from 10 mL blood tube | positive                  | ND         | positive | ND                           | ND         | positive |

Table S1. Cont.

| Isolate/Field Strains                       | Sample for Extraction                             | <i>Babesia bovis</i> PCRs               |            |          | <i>Babesia bigemina</i> PCRs |            |          |          |
|---------------------------------------------|---------------------------------------------------|-----------------------------------------|------------|----------|------------------------------|------------|----------|----------|
|                                             |                                                   | Standard PCR                            | TaqMan PCR | SYBR PCR | Standard PCR                 | TaqMan PCR | SYBR PCR |          |
| <i>B. bovis</i> —13                         | 200 µL RBC pellet from 10 mL blood tube           | positive                                | ND         | positive | ND                           | ND         | Negative |          |
| <i>B. bovis</i> —14                         |                                                   | positive                                | ND         | positive | ND                           | ND         | negative |          |
| <i>B. bovis</i> —15                         |                                                   | positive                                | ND         | positive | ND                           | ND         | negative |          |
| <i>B. bovis</i> —16                         |                                                   | positive                                | ND         | positive | ND                           | ND         | positive |          |
| <i>B. bovis</i> —17                         |                                                   | negative                                | ND         | positive | ND                           | ND         | negative |          |
| <i>B. bovis</i> —18                         |                                                   | positive                                | ND         | positive | ND                           | ND         | negative |          |
| <i>B. bovis</i> —19                         |                                                   | positive                                | ND         | positive | ND                           | ND         | negative |          |
| <i>B. bovis</i> —20                         |                                                   | positive                                | ND         | positive | ND                           | ND         | negative |          |
| <i>B. bovis</i> —21                         |                                                   | positive                                | ND         | positive | ND                           | ND         | negative |          |
| <i>B. bovis</i> —22                         |                                                   | negative                                | ND         | positive | ND                           | ND         | negative |          |
| <i>B. bovis</i> —23                         |                                                   | negative                                | ND         | positive | ND                           | ND         | negative |          |
| <i>B. bovis</i> —24                         |                                                   | negative                                | ND         | positive | ND                           | ND         | negative |          |
| <i>B. bovis</i> —25                         |                                                   | negative                                | ND         | positive | ND                           | ND         | negative |          |
| <i>B. bovis</i> —26                         |                                                   | negative                                | ND         | positive | ND                           | ND         | negative |          |
| <i>B. bovis</i> —27                         |                                                   | positive                                | ND         | positive | ND                           | ND         | negative |          |
| <i>B. bovis</i> —28                         |                                                   | positive                                | ND         | positive | ND                           | ND         | negative |          |
| <i>B. bovis</i> —29                         |                                                   | positive                                | ND         | positive | ND                           | ND         | positive |          |
| <i>B. bovis</i> —30                         |                                                   | blood smear (venous)                    | positive   | ND       | positive                     | ND         | ND       | negative |
| <i>B. bovis</i> —31                         |                                                   | 200 µL RBC pellet from 10 mL blood tube | negative   | ND       | positive                     | ND         | ND       | positive |
| <i>B. bigemina</i> —G strain vaccine strain |                                                   | Blood 75 mL                             | negative   | negative | negative                     | positive   | positive | positive |
| <i>B. bigemina</i> —1 (C48) <sup>1</sup>    | whole blood stabilates 2.5 mL blood cryopreserved | ND                                      | ND         | positive | positive                     | positive   | positive |          |
| <i>B. bigemina</i> —2 (F56) <sup>1</sup>    |                                                   | ND                                      | ND         | negative | positive                     | positive   | positive |          |
| <i>B. bigemina</i> —3 (F95) <sup>1</sup>    |                                                   | ND                                      | ND         | negative | positive                     | positive   | positive |          |
| <i>B. bigemina</i> —4 (G24) <sup>1</sup>    |                                                   | ND                                      | ND         | negative | positive                     | positive   | positive |          |
| <i>B. bigemina</i> —5 (G30) <sup>1</sup>    |                                                   | ND                                      | ND         | negative | positive                     | positive   | positive |          |
| <i>B. bigemina</i> —6 (G41) <sup>2</sup>    |                                                   | ND                                      | ND         | negative | positive                     | positive   | positive |          |

Table S1. Cont.

| Isolate/Field Strains                     | Sample for Extraction                             | <i>Babesia bovis</i> PCRs |            |          | <i>Babesia bigemina</i> PCRs |            |          |
|-------------------------------------------|---------------------------------------------------|---------------------------|------------|----------|------------------------------|------------|----------|
|                                           |                                                   | Standard PCR              | TaqMan PCR | SYBR PCR | Standard PCR                 | TaqMan PCR | SYBR PCR |
| <i>B. bigemina</i> —7 (G59) <sup>2</sup>  | whole blood stabilates 2.5 mL blood cryopreserved | ND                        | ND         | negative | faint positive               | positive   | Positive |
| <i>B. bigemina</i> —8 (H13) <sup>1</sup>  |                                                   | ND                        | ND         | negative | positive                     | positive   | positive |
| <i>B. bigemina</i> —9 (H17) <sup>1</sup>  |                                                   | ND                        | ND         | negative | positive                     | positive   | positive |
| <i>B. bigemina</i> —10 (H23) <sup>1</sup> |                                                   | ND                        | ND         | negative | positive                     | positive   | positive |
| <i>B. bigemina</i> —11 (H46) <sup>1</sup> |                                                   | ND                        | ND         | positive | faint positive               | positive   | positive |
| <i>B. bigemina</i> —12 (H48) <sup>1</sup> |                                                   | ND                        | ND         | positive | positive                     | positive   | positive |
| <i>B. bigemina</i> —13 (H51) <sup>2</sup> |                                                   | ND                        | ND         | positive | positive                     | positive   | positive |
| <i>B. bigemina</i> —14 (H73) <sup>2</sup> |                                                   | ND                        | ND         | negative | positive                     | positive   | positive |

Orange highlight: Indicates mixed infection of *B. bovis* and *B. bigemina* detected using Qpcr; <sup>1</sup> field isolate, no Babesia vaccination history known; <sup>2</sup> field isolate with known *Babesia* spp. vaccination history.

**Table S2.** Use of standard PCR and SYBR Green qPCR to detect both *B. bovis* and *B. bigemina* in 17 vaccinated cattle at 4 time points post-inoculation (Days 7, 9, 11 and 14), total 68 samples.

| Day    | Animal No. | PCR Assay               |          |                      |          |
|--------|------------|-------------------------|----------|----------------------|----------|
|        |            | <i>Babesia bigemina</i> |          | <i>Babesia bovis</i> |          |
|        |            | SYBR qPCR               | std PCR  | SYBR qPCR            | std PCR  |
| Day 7  | 9597       | negative                | negative | negative             | negative |
| Day 9  |            | positive                | negative | negative             | negative |
| Day 11 |            | positive                | positive | negative             | negative |
| Day 14 |            | positive                | negative | positive             | positive |
| Day 7  | 9598       | positive                | negative | negative             | negative |
| Day 9  |            | positive                | negative | negative             | negative |
| Day 11 |            | positive                | positive | positive             | positive |
| Day 14 |            | positive                | positive | positive             | positive |
| Day 7  | 9599       | positive                | positive | negative             | negative |
| Day 9  |            | positive                | positive | negative             | negative |
| Day 11 |            | positive                | negative | positive             | positive |

Table S2. Cont.

| Day    | Animal No. | PCR Assay               |          |                      |          |
|--------|------------|-------------------------|----------|----------------------|----------|
|        |            | <i>Babesia bigemina</i> |          | <i>Babesia bovis</i> |          |
|        |            | SYBR qPCR               | std PCR  | SYBR qPCR            | std PCR  |
| Day 14 |            | positive                | negative | positive             | Positive |
| Day 7  | 9600       | positive                | negative | positive             | negative |
| Day 9  |            | positive                | positive | positive             | positive |
| Day 11 |            | positive                | negative | positive             | positive |
| Day 14 |            | positive                | negative | positive             | positive |
| Day 7  | 9601       | positive                | positive | negative             | negative |
| Day 9  |            | positive                | positive | positive             | negative |
| Day 11 |            | positive                | negative | positive             | positive |
| Day 14 |            | positive                | negative | positive             | positive |
| Day 7  | 9602       | positive                | negative | positive             | negative |
| Day 9  |            | positive                | positive | positive             | negative |
| Day 11 |            | positive                | positive | positive             | positive |
| Day 14 |            | positive                | negative | positive             | positive |
| Day 7  | 9603       | positive                | positive | negative             | negative |
| Day 9  |            | positive                | positive | positive             | positive |
| Day 11 |            | positive                | negative | positive             | positive |
| Day 14 |            | positive                | negative | positive             | positive |
| Day 7  | 9604       | positive                | negative | negative             | negative |
| Day 9  |            | positive                | negative | negative             | negative |
| Day 11 |            | positive                | positive | negative             | negative |
| Day 14 |            | positive                | positive | negative             | negative |
| Day 7  | 9605       | positive                | negative | negative             | negative |
| Day 9  |            | positive                | positive | negative             | negative |
| Day 11 |            | positive                | positive | positive             | negative |
| Day 14 |            | positive                | negative | positive             | positive |
| Day 7  | 9607       | positive                | negative | positive             | negative |

Table S2. Cont.

| Day    | Animal No. | PCR Assay               |                |                      |          |
|--------|------------|-------------------------|----------------|----------------------|----------|
|        |            | <i>Babesia bigemina</i> |                | <i>Babesia bovis</i> |          |
|        |            | SYBR qPCR               | std PCR        | SYBR qPCR            | std PCR  |
| Day 9  |            | positive                | positive       | positive             | Positive |
| Day 11 |            | positive                | positive       | positive             | positive |
| Day 14 |            | positive                | negative       | positive             | positive |
| Day 7  | 9609       | negative                | negative       | negative             | negative |
| Day 9  |            | positive                | negative       | negative             | negative |
| Day 11 |            | positive                | positive       | positive             | negative |
| Day 14 |            | positive                | positive       | positive             | positive |
| Day 7  | 9610       | positive                | negative       | negative             | negative |
| Day 9  |            | positive                | positive       | negative             | negative |
| Day 11 |            | positive                | positive       | positive             | positive |
| Day 14 |            | positive                | negative       | positive             | positive |
| Day 7  | 9611       | negative                | negative       | negative             | negative |
| Day 9  |            | positive                | negative       | positive             | positive |
| Day 11 |            | positive                | negative       | positive             | positive |
| Day 14 |            | positive                | negative       | positive             | positive |
| Day 7  | 9614       | positive                | negative       | negative             | negative |
| Day 9  |            | positive                | positive       | negative             | negative |
| Day 11 |            | positive                | positive       | positive             | negative |
| Day 14 |            | positive                | faint positive | positive             | positive |
| Day 7  | 9616       | positive                | positive       | positive             | positive |
| Day 9  |            | positive                | positive       | positive             | positive |
| Day 11 |            | positive                | positive       | positive             | positive |
| Day 14 |            | positive                | negative       | positive             | positive |
| Day 7  | 9618       | positive                | negative       | positive             | negative |
| Day 9  |            | positive                | negative       | negative             | negative |
| Day 11 |            | positive                | positive       | negative             | negative |
| Day 14 |            | positive                | positive       | negative             | negative |

Yellow highlight indicates negative qPCR/standard PCR; orange highlight indicates negative standard PCR yet qPCR positive.
